# Supplementary material
Source: publisher site journal article supplement (http://www.spandidos-publications.com/5988/downloadSupplementary)
Supplement: Supplementary file 1 [file downloadSupplementary]

## Sheet: Characteristics_includ._studies
Table SIV. Characteristics of included studies.
First author,year	Country of origin	Population/Patients with BC	Exposure	Outcomes	Inclusion criteria	Exclusion criteria	Samples, n	Type of samples	BC samples, n (%)	Most prevalent BC type, n (%)	Mean patient age	HPV+ patients with BC, n (%)	Benign/Normal samples, n (%)	HPV+ controls, n (%)	Most prevalent HPV type in patients with BC (n, %)	(Refs.)
Afshar et al, 2018	Iran	Patients with BC treated surgically	HPV DNA	BC, breast carcinoma, mammary carcinoma	Not assessed	Not assessed	138	PE	98/138 (71.01)	Not specified	49.53	8/98 (8.16)	40/138 (28.99)	0/40 (0.00)	HR-HPV-16/18 (5/8, 62.50)	(74)
Ahangar-Oskouee et al, 2014	Iran	Patients with BC treated surgically	HPV DNA	BC, breast carcinoma, mammary carcinoma	Not assessed	Not assessed	130	FFPE	65/130 (50.00)	IDC, 50/65 (76.92)	Not specified	21/64 (32.81)	65/130 (50.00)	0/65 (0.00)	LR-HPV-6 (17/21, 80.95)	(75)
Alinezhadi et al,2022	Iran	Patients with BC treated surgically	HPV DNA	BC, breast carcinoma, mammary carcinoma	Not assessed	Not assessed	95	FFPE	63/95 (66.30)	IDC, 63/95 (66.32)	43.54	8/63 (12.69)	32/95 (33.70)	9/32 (28.12)	HR-HPV-33 (3/8, 37.50)	(7)
Antonsson et al, 2011	Australia	Patients with BC treated surgically (2003-2007)	HPV DNA	BC, breast carcinoma, mammary carcinoma	Not assessed	Not assessed	58	Fresh frozen	54/58 (93.10)	IDC, 47/54 (87.04)	57	27/54 (50.00)	4/58 (6.90)	1/4 (25.00)	HR-HPV-18 (27/27, 100)	(76)
Bakhtiyrizadeh et al, 2017	Iran	Patients with BC treated surgically (January 2011-December 2015)	HPV DNA	BC, breast carcinoma, mammary carcinoma	Not assessed	Not assessed	300	FFPE	150/300 (50.00)	IDC, 146/150 (97.33)	35.2	0/150 (0.00)	150/300 (50.00)	0/150 (0.00)	None	(77)
Cavalcante et al, 2018	Brazil	Patients with BC treated surgically	HPV DNA	BC, breast carcinoma, mammary carcinoma	Not assessed	Not assessed	198	FFPE	103/198 (52.02)	Not specified	55.2	57/103 (55.34)	95/198 (47.98)	15/95 (15.79)	LR-HPV-6 and LR-HPV-119 (7/57, 12.28)	(78)
Chang et al, 2012	China	Patients with BC treated surgically	HPV DNA	BC, breast carcinoma, mammary carcinoma	Not assessed	Not assessed	78	Fresh frozen	48/78 (61.54)	Not specified	43.00 (median)	0/48 (0.00)	30/78 (38.46)	0/30 (0.00)	None	(79)
Damin et al, 2004	Brazil	Patients with BC treated surgically	HPV DNA	BC, breast carcinoma, mammary carcinoma	No prior surgery, radiation or cytotoxic therapy for BC	Not assessed	142	PE	101/142 (71.13)	IDC, 92/101 (91.09)	56.1	25/101 (25.74)	41/142 (28.87)	0/41 (0.00)	HR-HPV-16 (14/25, 56.00)	(80)
de León et al, 2009	Mexico	Patients with BC treated surgically (January 1999-December 2003)	HPV DNA	BC, breast carcinoma, mammary carcinoma	Not assessed	Not assessed	94	FFPE	51/94 (54.26)	IDC, 48/51 (94.12)	53.3	15/51 (29.41)	43/94 (45.74)	0/43 (0.00)	HR-HPV-16 (10/15, 66.67)	(81)
Delgado-García et al, 2017	Spain	Patients with BC treated surgically (2006-2012)	HPV DNA	BC, breast carcinoma, mammary carcinoma	i) Female patients subjected to surgical treatment due to infiltrating BC and/or carcinoma in situ (cases) or benign breast disease (controls; period 2006-2012); ii) patients ≥18 years of age; iii) PE surgical specimens (stored in the tumor biobank of our institution) in adequate conditions and sufficient amount of tissue for the purposes of the study; iv) written informed consent obtained from p…	i) Males; and ii) lack of the minimum required quality controls in the analyzed DNA samples	437	FFPE	251/437 (57.40)	Not specified	56.32	130/251 (51.80)	186/437 (42.60)	49/186 (26.30)	HR-HPV-16 (15 of total sample)	(21)
Doosti et al, 2016	Iran	Patients with BC treated surgically	HPV DNA	BC, breast carcinoma, mammary carcinoma	Not assessed	Not assessed	171	FFPE	87/171 (50.88)	IDC, 66/87 (75.86)	47.7	20/87 (22.99)	84/171 (49.12)	0/84 (0.00)	LR-HPV-6 (9/20, 45.00)	(82)
ElAmrani et al, 2018	Morocco	Patients with BC undergone surgical excision for diagnosis or treatment of their breast lumps (2010-2012)	HPV DNA	BC, breast carcinoma, mammary carcinoma	Not assessed	Patients who did not give their consent	88	Fresh frozen	76/88 (86.36)	IDC, 64/76 (84.21)	46.9	19/76 (25.00)	12/88 (13.67)	1/12 (8.33)	LR-HPV-4 and LR-HPV-11 (10.53)	(83)
Fu et al, 2015	China	Patients with BC treated surgically (2006-2012)	HPV DNA	BC, breast carcinoma, mammary carcinoma	Not assessed	i) Prior surgery; ii) radiation; and iii) cytotoxic therapy for BC	252	FFPE	169/252 (67.06)	IDC, 134/169 (79.29)	53	25/169 (14.79)	83/252 (32.94)	1/83 (1.20)	HR-HPV-58 only type studied (25/25, 100.00)	(84)
Gannon et al, 2015	Australia	Patients with BC treated surgically	HPV DNA	BC, breast carcinoma, mammary carcinoma	Not assessed	Not assessed	90	Fresh frozen	80/90 (88.89)	IDC, 58/80 (72.5)	Not specified	13/80 (16.25)	10/90 (11.11)	1/10 (10.00)	None	(85)
Li et al, 2015	China	Patients with BC treated surgically (June 2009-July 2014)	HPV DNA	BC, breast carcinoma, mammary carcinoma	All subjects were genetically unrelated ethnic Han Chinese women.	i) History of cancer; ii) metastasized cancer from other organs; and iii) neo-adjuvant treatments	279	PE	187/279 (67.03)	IDC, 148/187 (79.14)	57.1	3/187 (1.60)	92/279 (32.97)	0/92 (0.00)	HR-HPV-16, HR-HPV-18 and LR-HPV-6 (all 1/3, 33.00)	(86)
Maldonado-Rodríguez et al, 2022	Mexico	Patients with BC treated surgically (2009-2019)	HPV DNA	BC, breast carcinoma, mammary carcinoma	Not assessed	Not assessed	116	FFPE	59/116 (50.86)	IDC, 44/59 (74.58)	59	12/59 (20.34)	57/116 (49.13)	19/57 (33.33)	Not specified for patients with BC	(3)
Mendizabal-Ruiz et al, 2009	Mexico	Patients with BC treated surgically	HPV DNA	BC, breast carcinoma, mammary carcinoma	Not assessed	Patients with family history of BC	107	FFPE	67/107 (62.62)	IDC, 48/67 (71.64)	Not specified	3/67 (4.48)	40/107 (37.38)	0/40 (0.00)	HR-HPV-31 (2/3, 66.67)	(87)
Mou et al, 2011	China	Sporadic patients with BC treated surgically (July 2006-November 2008)	HPV DNA	BC, breast carcinoma, mammary carcinoma	Previous history of cervical cancer or dysplasia, or clinical evidence of HPV infection	Not assessed	108	Fresh frozen	62/108 (57.41)	Not specified	53.79	4/62 (6.45)	46/108 (52.59)	0/46 (0.00)	HR-HPV-16 (3/4, 75.00)	(18)
Salman et al, 2017	UK	Patients with BC treated surgically	HPV DNA	BC, breast carcinoma, mammary carcinoma	Not assessed	Not assessed	110	Fresh	74/110 (67.27)	IDC, 23/74 (31.08)	Not specified	35/74 (47.30)	36/110 (32.73)	11/36 (30.56)	HR-HPV-39 (13/35, 37.14)	(88)
Sigaroodi et al, 2012	Iran	Patients with BC treated surgically (2002-2009)	HPV DNA	BC, breast carcinoma, mammary carcinoma	Not assessed	Not assessed	130	FFPE	79/130 (60.77)	IDC, 67/79 (84.81)	47.77	15/79 (18.99)	51/130 (39.23)	1/51 (1.96)	HR-HPV-16 and HR-HPV-18 (each 4/15, 26.67)	(89)
Tawfeik et al, 2020	Egypt	Volunteers visiting oncology clinic (February 2018-March 2019)	HPV DNA	BC, breast carcinoma, mammary carcinoma	All new treatment-naïve cases of histologically confirmed BC at any stage	i) Systemic therapy prior to surgery; ii) bilateral BC; iii) metastatic or recurrent disease; and iv) cancer of other origin	35	Frozen	20/35 (57.14)	IDC, 14/20 (70.00)	50.6	4/20 (20.00)	15/35 (42.86)	0/15 (0.00)	HR-HPV-16 (3/4, 75.00)	(90)
Vernet-Tomas et al, 2015	Spain	Patients with BC treated surgically (2000-2011)	HPV DNA	BC, breast carcinoma, mammary carcinoma	Not assessed	Not assessed	78	PE	76/78 (97.44)	IDC, 29/76 (38.16)	61.50 (median)	0/76 (0.00)	2/78 (2.56)	0/2 (0.00)	None	(91)
Wang et al, 2014	China	Patients with BC treated surgically (October 2010-October 2011)	HPV DNA	BC, breast carcinoma, mammary carcinoma	Not assessed	i) Systemic therapy prior to surgery; ii) bilateral BC; iii) metastatic or recurrent disease; and iv) cancer of other origin	9	Fresh frozen	7/9 (77.78)	Not specified	Not specified	1/7 (14.29)	2/9 (22.22)	1/2 (50.00)	HR-HPV-16 (2/2, 100.00)	(92)
HPV, human papillomavirus; BC, breast cancer; PE, paraffin-embedded; FFPE, formalin-fixed paraffin-embedded, HR-HPV, high risk-HPV; LR-HPV, low risk-HPV.
